# Supplementary material for: Effects of habitat area and spatial configuration on biodiversity in an experimental intertidal community
Source: PubMed Central journal article supplement — Ecology. 2019 May 30;100(8):e02757. doi: 10.1002/ecy.2757 (PMC6851599; doi:10.1002/ecy.2757), 2019-05-30
Supplement: ECY-100-na-s001.pdf [file ECY-100-na-s001.pdf]

**Appendix S1: Supplemental Figures and Tables**

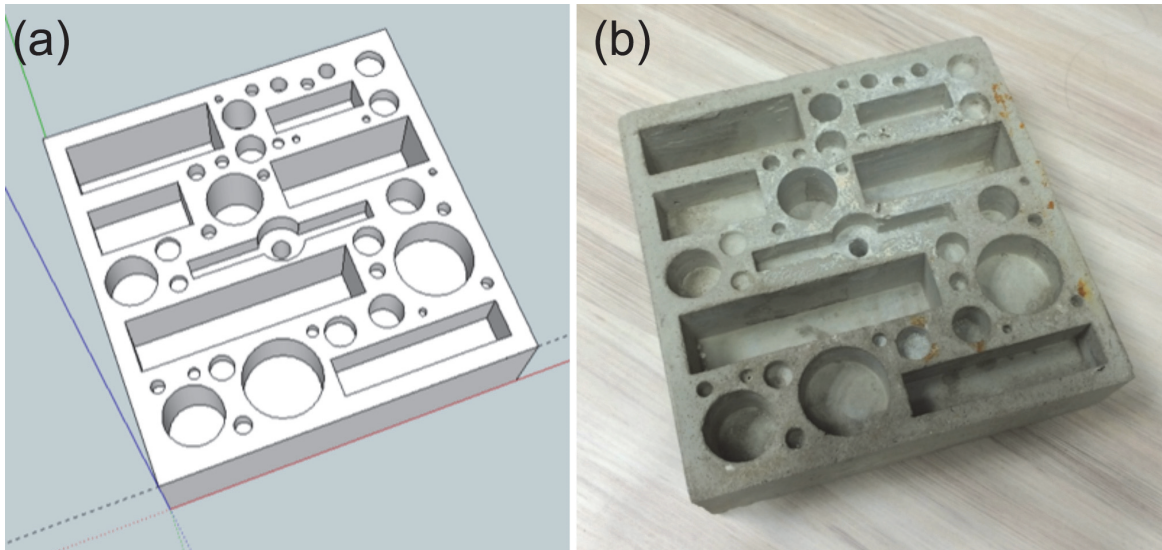

**Figure S1.** (a) 3D model of a single concrete tile ( $0.2\text{ m} \times 0.2\text{ m} \times 0.06\text{ m}$ ) used in this study to create  $2.4\text{ m} \times 2.4\text{ m}$  experimental landscape plots; (b) photograph of an actual concrete tile.

**Table S1.** List of species/morphospecies and algal functional groups found in this study.

| No. | Class      | Species/Morphospecies                |
|-----|------------|--------------------------------------|
| 1   | Gastropoda | <i>Cellana radiata</i>               |
| 2   | Gastropoda | <i>Siphonaria guamensis</i>          |
| 3   | Gastropoda | <i>Siphonaria atra</i>               |
| 4   | Gastropoda | <i>Patelloida saccharinoides</i>     |
| 5   | Gastropoda | <i>Nerita albicilla</i>              |
| 6   | Gastropoda | <i>Nerita chamaeleon</i>             |
| 7   | Gastropoda | <i>Nerita undata</i>                 |
| 8   | Gastropoda | <i>Planaxis sulcatus</i>             |
| 9   | Gastropoda | <i>Pictocollumbella ocellata</i>     |
| 10  | Gastropoda | <i>Pardalina testudinaria</i>        |
| 11  | Gastropoda | <i>Euplica scripta</i>               |
| 12  | Gastropoda | <i>Monodonta labio</i>               |
| 13  | Gastropoda | <i>Strombus urceus</i>               |
| 14  | Gastropoda | <i>Pollia fumosa</i>                 |
| 15  | Gastropoda | <i>Engina armillata</i>              |
| 16  | Gastropoda | <i>Trochus maculatus</i>             |
| 17  | Gastropoda | <i>Reisha bitubercularis</i>         |
| 18  | Gastropoda | <i>Mancinella echinata</i>           |
| 19  | Gastropoda | <i>Zafra</i> sp.                     |
| 20  | Gastropoda | <i>Nassarius livescens</i>           |
| 21  | Gastropoda | <i>Nassarius crenoliratus</i>        |
| 22  | Gastropoda | <i>Cantharus</i> sp.                 |
| 23  | Gastropoda | <i>Drupella margariticola</i>        |
| 24  | Gastropoda | <i>Morula musiva</i>                 |
| 25  | Gastropoda | <i>Muricodrupa fiscella</i>          |
| 26  | Gastropoda | <i>Cerithium zonatum</i>             |
| 27  | Gastropoda | <i>Cerithium traillii</i>            |
| 28  | Gastropoda | <i>Clypeomorus batillariaeformis</i> |
| 29  | Gastropoda | <i>Semiricinula muricoides</i>       |
| 30  | Gastropoda | Rissoidae sp. 1                      |
| 31  | Gastropoda | <i>Littoraria articulata</i>         |
| 32  | Gastropoda | <i>Littoraria strigata</i>           |
| 33  | Gastropoda | <i>Echinolittorina melanacme</i>     |
| 34  | Gastropoda | <i>Echinolittorina malaccana</i>     |
| 35  | Gastropoda | <i>Collonista</i> sp.                |
| 36  | Gastropoda | <i>Turbo brunneus</i>                |
| 37  | Gastropoda | <i>Peronia verruculata</i>           |
| 38  | Bivalvia   | <i>Modiolus</i> sp.                  |
| 39  | Bivalvia   | Mytilidae sp. 1                      |
| 40  | Bivalvia   | <i>Barbatia amygdalumtostum</i>      |
| 41  | Bivalvia   | <i>Septifer bilocularis</i>          |
| 42  | Bivalvia   | <i>Septifer excisus</i>              |
| 43  | Bivalvia   | <i>Semele</i> sp.                    |
| 44  | Bivalvia   | <i>Pinctada</i> sp.                  |

**SUPPORTING INFORMATION.** LOKE, L. H. L., R. A. CHISHOLM, AND P. A. TODD. 2019. EFFECTS OF HABITAT AREA AND SPATIAL CONFIGURATION ON BIODIVERSITY IN AN EXPERIMENTAL INTERTIDAL COMMUNITY AT A LANDSCAPE SCALE. ECOLOGY.

|                               |                              |                                                                                                   |
|-------------------------------|------------------------------|---------------------------------------------------------------------------------------------------|
| 45                            | Bivalvia                     | <i>Arca naticularis</i>                                                                           |
| 46                            | Bivalvia                     | <i>Isognomon legumen</i>                                                                          |
| 47                            | Polyplacophora               | <i>Acanthopleura gemmata</i>                                                                      |
| 48                            | Malacostraca                 | <i>Baruna trigranulum</i>                                                                         |
| 49                            | Malacostraca                 | <i>Nanosessarma minutum</i>                                                                       |
| 50                            | Malacostraca                 | <i>Metopograpsus thukuhar</i>                                                                     |
| 51                            | Malacostraca                 | <i>Metopograpsus frontalis</i>                                                                    |
| 52                            | Malacostraca                 | <i>Portunus</i> sp.                                                                               |
| 53                            | Malacostraca                 | <i>Diogenes</i> sp.                                                                               |
| 54                            | Malacostraca                 | Hymenosomatidae sp. 1                                                                             |
| 55                            | Malacostraca                 | <i>Ligia exotica</i>                                                                              |
| 56                            | Malacostraca                 | <i>Talitridae</i> sp.                                                                             |
| 57                            | Maxillopoda                  | <i>Tetraclita</i> sp.                                                                             |
| 58                            | Maxillopoda                  | <i>Balanus</i> sp.                                                                                |
| 59                            | Demospongiae                 | Spongiidae                                                                                        |
| 60                            | Polychaeta                   | Nereididae                                                                                        |
| 61                            | Polychaeta                   | Ampharetidae                                                                                      |
| 62                            | Polychaeta                   | Serpulidae                                                                                        |
| 63                            | Polychaeta                   | Sabellidae                                                                                        |
| 64                            | Polychaeta                   | Syllidae                                                                                          |
| 65                            | Polychaeta                   | Terebellidae                                                                                      |
| 66                            | Polychaeta                   | Trichobranchaetidae                                                                               |
| 67                            | Polychaeta                   | Polynoidae                                                                                        |
| 68                            | Holothuroidea                | <i>Colochirus quadrangularis</i>                                                                  |
| 69                            | Ascidiacea                   | Didemnidae sp. 1                                                                                  |
| <b>Algal functional group</b> |                              | <b>Dominant component taxa</b>                                                                    |
| 70                            | Microalgae                   | Unidentified cyanobacteria and diatoms                                                            |
| 71                            | Ephemeral turf algae         | <i>Ulva</i> spp.                                                                                  |
| 72                            | Red/brown algal assemblage   | <i>Parviphyicus antipae</i> , <i>Gelidiopsis variabilis</i> , <i>Dictyota</i> spp. and Ceramiales |
| 73                            | Encrusting algae             | Ralfsiaceae and/or Neoralfsiaceae, and crustose coralline algae                                   |
| 74                            | Articulated calcareous algae | <i>Jania</i> spp.                                                                                 |
| 75                            | Foliose algae                | <i>Padina</i> spp.                                                                                |
| 76                            | Sargassum                    | <i>Sargassum</i> spp.                                                                             |

**Table S2.** Mean species richness ( $\pm$  SD) of the nine different plot configurations.

|                 | <b>SL</b>      | <b>SS</b>       | <b>LOT</b>     | <b>Average</b> |
|-----------------|----------------|-----------------|----------------|----------------|
| <b>30 tiles</b> | 19.5 $\pm$ 1.1 | 28.75 $\pm$ 2.3 | 19 $\pm$ 3.2   | 22.4           |
| <b>20 tiles</b> | 13.5 $\pm$ 3.4 | 26.5 $\pm$ 4.4  | 19.5 $\pm$ 8.3 | 19.8           |
| <b>10 tiles</b> | 15.5 $\pm$ 1.8 | 12.75 $\pm$ 8.4 | 15 $\pm$ 2.9   | 14.4           |
| <b>Average</b>  | 16.1           | 22.7            | 17.8           |                |

**Table S3.** Permutational distance-based multivariate analysis of variance (PERMANOVA) based on Bray-Curtis dissimilarities of the relative abundances ( $\log(X+1)$  transformed) of 76 taxa in response to Area, Configuration and their interactions.

| Source                      | df | MS     | Pseudo-F | <i>P</i> (perm) |
|-----------------------------|----|--------|----------|-----------------|
| Area                        | 2  | 1499.0 | 1.0      | 0.4805          |
| Configuration               | 2  | 1999.2 | 1.3      | 0.1838          |
| Area $\times$ Configuration | 4  | 1341.1 | 0.9      | 0.6836          |
| Residual                    | 27 | 1556.9 |          |                 |
| Total                       | 35 |        |          |                 |
