# Supplementary material for: Effects of habitat area and spatial configuration on biodiversity in an experimental intertidal community
Source: PubMed Central journal article supplement — Ecology. 2019 May 30;100(8):e02757. doi: 10.1002/ecy.2757 (PMC6851599; doi:10.1002/ecy.2757), 2019-05-30
Supplement: ECY-100-na-s002.pdf [file ECY-100-na-s002.pdf]

**Loke, L. H. L., Chisholm, R. A., and Todd, P. A., 2019. Effects of habitat area and spatial configuration on biodiversity in an experimental intertidal community. *Ecology*.**

---

## **Data S1**

### **Data and code for model and statistical analyses**

---

## **Author**

Lynette H. L. Loke  
National University of Singapore  
14 Science Drive 4, Singapore 117543  
Email: [lynetteloke@gmail.com](mailto:lynetteloke@gmail.com)

---

## **File list (files found within DataS1.zip)**

`Richness.csv`  
`PACommunity.csv`  
`CodeS1.R`

## **Description**

`Richness.csv` – Species richness and abundance data for each experimental treatment.

Area: Area treatment; i.e. Area=0, 10, 20 or 30.

Fragmentation: Configuration treatment; i.e. ‘Single Large’ (SL), ‘Several-Small’ (SS) or ‘Lots-of-Tiny’ (LOT).

N\_Tiles: Number of individuals sampled from tile habitats only

N\_Wall: Number of individuals sampled from matrix (i.e. background seawall) only

N\_Total: Total number of individuals observed in the whole experimental plot

S\_Tiles: Species richness of all tile habitats only

`S_Wall`: Species richness of the matrix (i.e. background seawall) only

`S_Total`: Total species richness of the whole experimental plot

`PACommunity.csv` – Community data used for the null model analysis.

`CodeS1.R` – Code for SAR models and null model analysis.

---
